# Supplementary material
Source: MDPI journal article supplement (https://www.mdpi.com/2079-3197/9/8/87)
Supplement: s1 [file s1]

*Article*

# Predicting Interfacial Thermal Resistance by Ensemble Learning

Mingguang Chen <sup>1,\*</sup>, Junzhu Li <sup>1</sup>, Bo Tian <sup>1</sup>, Yas Mohammed Al-Hadeethi <sup>2</sup>, Bassim Arkook <sup>2,3</sup>,  
Xiaojuan Tian <sup>4,\*</sup> and Xixiang Zhang <sup>1,\*</sup>

<sup>1</sup> Physical Science and Engineering Division, King Abdullah University of Science and Technology (KAUST), Thuwal 23955-6900, Saudi Arabia; junzhu.li@kaust.edu.sa (J.L.); bo.tian@kaust.edu.sa (B.T.)

<sup>2</sup> Department of Physics, King Abdulaziz University, Jeddah, Makkah 21589, Saudi Arabia; yalhadeethi@kau.edu.sa

<sup>3</sup> Department of Physics and Astronomy, University of California, Riverside, CA 92507, USA; barko001@ucr.edu

<sup>4</sup> Department of Chemical Engineering, China University of Petroleum, Beijing 102249, China

\* Correspondence: mingguang.chen@kaust.edu.sa (M.C.); tian@cup.edu.cn (X.T.); xixiang.zhang@kaust.edu.sa (X.Z.)

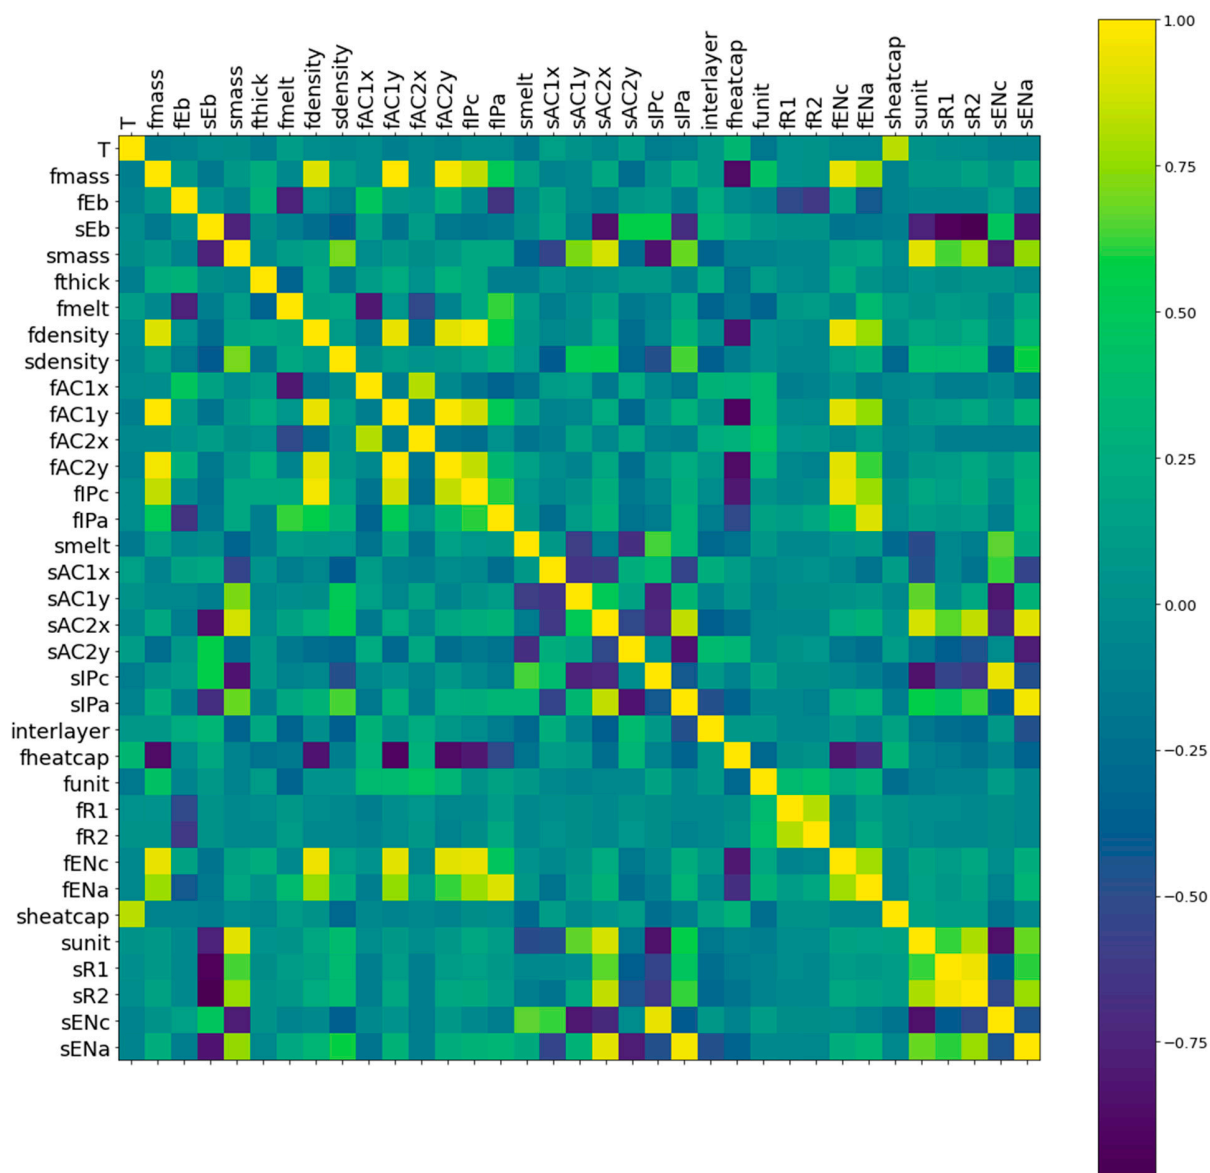

**Figure S1.** Pearson correlation coefficient map between all 35 descriptors in the raw dataset.

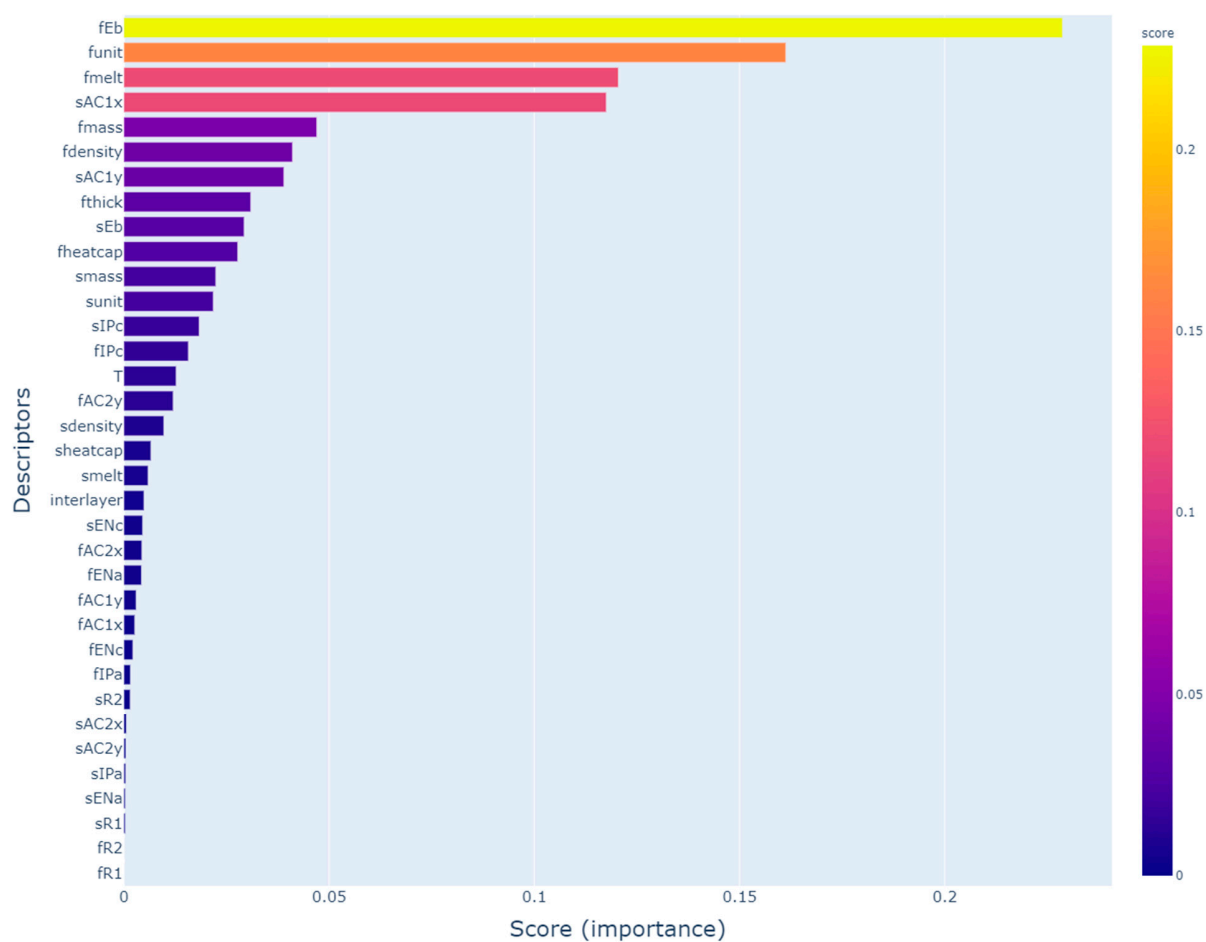

**Figure S2.** Rank of Descriptors based on importance score provided by XGB model.

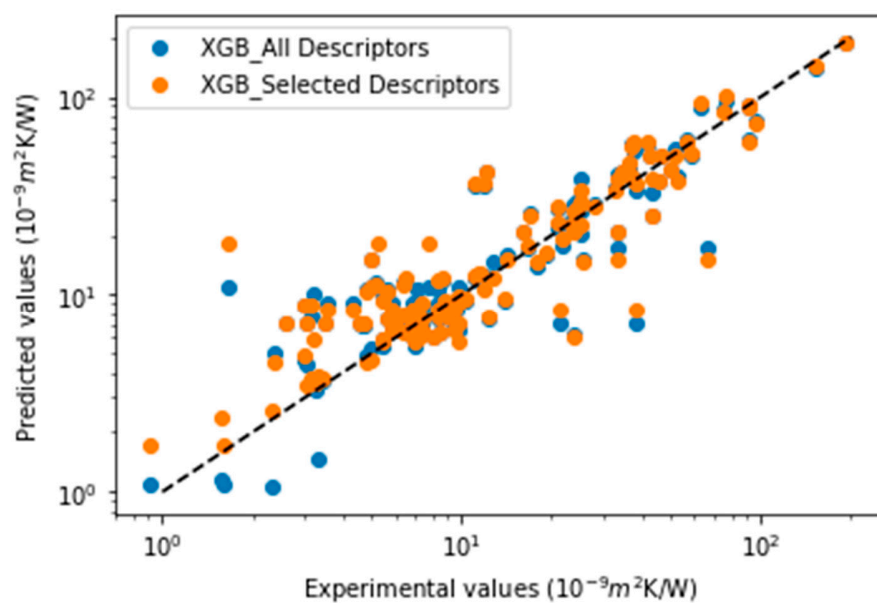

**Figure S3.** Correlation between the experimental values and values predicted by XGB model with all descriptors (blue dots) and selected descriptors (orange dots).

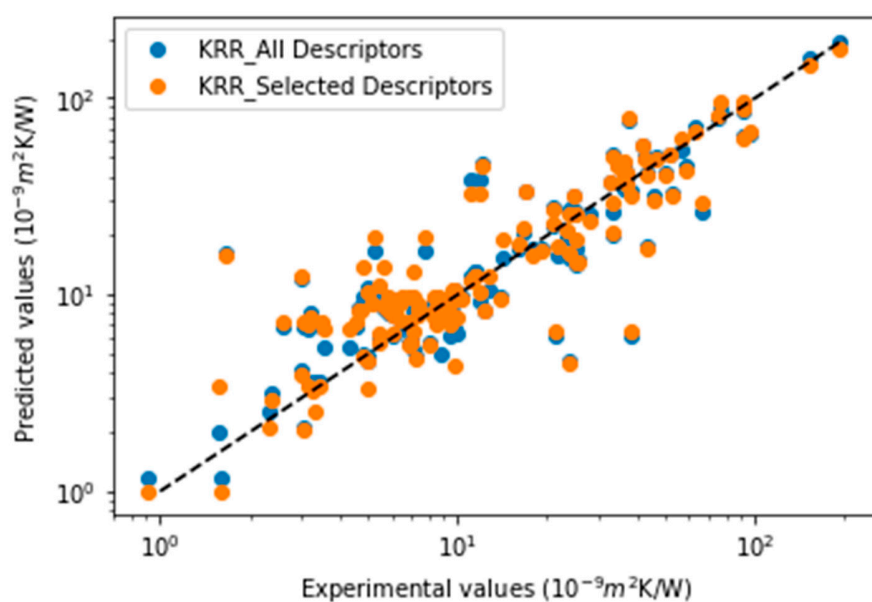

**Figure S4.** Correlation between the experimental values and values predicted by KRR model with all descriptors (blue dots) and selected descriptors (orange dots).

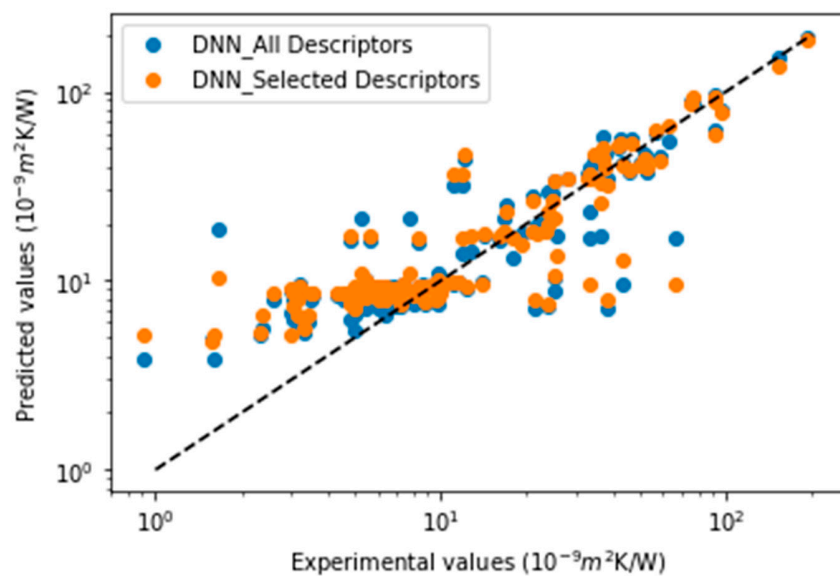

**Figure S5.** Correlation between the experimental values and values predicted by DNN model with all descriptors (blue dots) and selected descriptors (orange dots).

**Table S1.** Abbreviations of descriptors and the target explored in this work

| <b>Descriptor<br/>Abbreviation</b> | <b>Remarks</b>                                                                                                                                                                                              |
|------------------------------------|-------------------------------------------------------------------------------------------------------------------------------------------------------------------------------------------------------------|
| T                                  | temperature (K)                                                                                                                                                                                             |
| fmass                              | film mass (u)                                                                                                                                                                                               |
| fEb                                | film binding energy (eV/f.u.)                                                                                                                                                                               |
| sEb                                | substrate binding energy (eV/f.u.)                                                                                                                                                                          |
| smass                              | substrate mass (u)                                                                                                                                                                                          |
| fthick                             | film thickness (nm)                                                                                                                                                                                         |
| fmelt                              | film melting point (K)                                                                                                                                                                                      |
| fdensity                           | film density (g/cm <sup>3</sup> )                                                                                                                                                                           |
| sdensity                           | substrate density (g/cm <sup>3</sup> )                                                                                                                                                                      |
| fAC1x, fAC1y,<br>fAC2x, fAC2y      | atomic coordinates for film [The group as the x coordinate and the period as the y coordinate as (AC <sub>i</sub> x, AC <sub>i</sub> y), where i represents the order of the elements of the compound]      |
| fIPc                               | film ionic potential for cation                                                                                                                                                                             |
| fIPa                               | film ionic potential for anion                                                                                                                                                                              |
| smelt                              | substrate melting point (K)                                                                                                                                                                                 |
| sAC1x, sAC1y<br>sAC2x, sAC2y       | atomic coordinates for substrate [The group as the x coordinate and the period as the y coordinate as (AC <sub>i</sub> x, AC <sub>i</sub> y), where i represents the order of the elements of the compound] |
| sIPc                               | substrate ionic potential for cation                                                                                                                                                                        |
| sIPa                               | substrate ionic potential for anion                                                                                                                                                                         |
| fheatcap                           | film heat capacity (J/gK)                                                                                                                                                                                   |
| funit                              | film volume per formula unit (10 <sup>-29</sup> m <sup>3</sup> /f.u.)                                                                                                                                       |
| sR1                                | atomic ratio of the first element of substrate                                                                                                                                                              |
| sR2                                | atomic ratio of the second element of substrate                                                                                                                                                             |
| sENc                               | substrate electronegativity for cation                                                                                                                                                                      |
| sENa                               | substrate electronegativity for anion                                                                                                                                                                       |
| itr                                | interfacial thermal resistance (m <sup>2</sup> K/GW)                                                                                                                                                        |

**Table S2.** Top 20 material systems with high ITR predicted by ensemble model

| Material Systems | Predicted ITR by Ensemble Model |
|------------------|---------------------------------|
| Bi/Diamond       | 65.67                           |
| Bi/Graphite      | 63.57                           |
| Bi/Graphene      | 63.34                           |
| Bi/S             | 55.66                           |
| Bi/P             | 55.38                           |
| Bi/B             | 51.53                           |
| PtS/Diamond      | 50.42                           |
| PtS/Graphene     | 48.97                           |
| Bi/HgO           | 48.89                           |
| PtS/Graphite     | 48.48                           |
| Ag2O/Diamond     | 48.04                           |
| Bi/BN            | 47.98                           |
| Bi/B2O3          | 47.96                           |
| Bi/HgS           | 47.57                           |
| Sn/Diamond       | 47.49                           |
| Bi/BeO           | 47.22                           |
| Ag2O/GaP         | 47.21                           |
| PdTe/Diamond     | 47.15                           |
| ZnS/Diamond      | 46.96                           |
| S/Diamond        | 46.75                           |
