# Supplementary material
Source: MDPI journal article supplement (https://www.mdpi.com/2079-3197/9/8/87)
Supplement: s1 [file s1]

Archive with 4 entries (4 files):
- computation-1294881-supplementary.pdf
- Material system construction for ITR prediction.py
- Predicting high melting point, high ITR material systems.py
- XGB_KRR_DNN_Ensemble_model_training.py
